# Supplementary material for: Sex as modifier of survival in patients with advanced urothelial cancer treated with pembrolizumab
Source: Springer Nature journal article supplement (doi:10.1038/s41598-025-93094-2), 2025-03-14
Supplement: MOESM1 [file 41598_2025_93094_MOESM1_ESM.docx]

**Supplemetary materials**

**Tables**

**Table S1.** Treatment settings and response to therapy.

| **Characteristics** | **Overall** | **Males**  **(765 pts)** | **Females**  **(274 pts)** | ***p-value*** |
| --- | --- | --- | --- | --- |
| **Pembrolizumab setting**  Patients progressed during or after first-line platinum-based CT (%)  Patients relapsed within < 1y since neoadjuvant/adjuvant CT (%) | 655 (63)  384 (37) | 477 (62)  288 (38) | 178 (65)  96 (35) | 0.660 |
| **Best response to pembrolizumab**  Complete Response (CR)  Partial Response (PR)  Stable Disease (SD)  Progressive Disease (PD) | 83 (8)  228 (22)  250 (24)  478 (46) | 61 (8)  176 (23)  184 (24)  344 (45) | 22 (8)  52 (19)  66 (24)  134 (49) | 1.000  0.489  1.000  0.572 |
| **Median duration of response** (months) (range) | 12.7  (10.2–14.8) | 13.1  (10.5–16.8) | 10.9  (7.9–14.0) | 0.283 |
| **Patients receiving treatments following pembrolizumab** | 250 (24) | 178 (23) | 72 (26) | 0.623 |
| **Therapy following pembrolizumab**  Enfortumab vedotin  Paclitaxel  Vinflunine  Carboplatin and gemcitabine  Clinical trials  Carboplatin and paclitaxel  Docetaxel  Gemcitabine  Carboplatin  MVAC  Erdafitinib  Cyclophosphamide | 91 (9)  54 (5)  41 (4)  19 (2)  12 (1)  10 (1)  8 (1)  5 (<1)  3 (<1)  3 (<1)  3 (<1)  1 (<1) | 64 (8)  43 (6)  30 (4)  12 (2)  9 (1)  4 (1)  7 (1)  3 (<1)  2 (<1)  1 (<1)  2 (<1)  1 (<1) | 27 (10)  11 (4)  11 (4)  7 (3)  3 (1)  6 (2)  1 (<1)  2 (1)  1 (<1)  2 (1)  1 (<1)  0 (0) | - |

**Table S2.** Univariable and multivariable analyses in patients aged < 50y.

| **Overall Survival** | **Univariable Cox Regression** | | **Multivariable Cox Regression** | |
| --- | --- | --- | --- | --- |
| **HR (95%CI)** | ***p-value*** | **HR (95%CI)** | ***p-value*** |
| Sex (females vs males) | 2.11 (1.04−4.26) | **0.038** | 1.58 (0.74−3.36) | 0.234 |
| BMI (> 25 vs ≤ 25 kg/m2) | 0.76 (0.37−1.55) | 0.447 |  |  |
| Smokers vs non-smokers | 0.96 (0.44−2.06) | 0.908 |  |  |
| ECOG PS (≥ 2 vs 0-1) | 3.29 (1.30−8.36) | **0.012** | 2.88 (1.09−7.61) | **0.032** |
| Histology (mixed vs pure UC) | 1.93 (0.90−4.15) | 0.092 |  |  |
| Upper vs Lower urinary tract | 1.06 (0.64−1.76) | 0.819 |  |  |
| Synchronous metastatic disease (Y vs N) | 1.89 (0.94−3.80) | 0.072 |  |  |
| Lymph node (Y vs N) | 0.57 (0.28−1.12) | 0.104 |  |  |
| Lung metastases (Y vs N) | 1.12 (0.54−2.31) | 0.756 |  |  |
| Liver metastases (Y vs N) | 1.15 (0.54-2.49) | 0.711 |  |  |
| Bone metastases (Y vs N) | 0.87 (0.41-1.83) | 0.716 |  |  |
| Brain metastases (Y vs N) | 53.5 (3.30−85.41) | **0.005** | 50.7 (3.02-86.63) | **0.007** |
| BMI = Body Mass Index; ECOG-PS = Eastern Cooperative Oncology Group-Performance Status; Y = yes; N = no | | | | |

**Table S3.** Univariable and multivariable analyses in patients with lung metastases.

| **Overall Survival** | **Univariable Cox Regression** | | **Multivariable Cox Regression** | |
| --- | --- | --- | --- | --- |
| **HR (95%CI)** | ***p-value*** | **HR (95%CI)** | ***p-value*** |
| Sex (females vs males) | 1.38 (1.02−1.86) | **0.038** | 1.34 (1.01−1.83) | **0.047** |
| Age < 50y (Y vs N) | 1.13 (0.62−2.09) | 0.298 |  |  |
| BMI (> 25 vs ≤ 25….) | 0.74 (0.56−0.98) | **0.039** | 0.77 (0.58−1.03) | 0.082 |
| Smokers vs non-smokers | 0.78 (0.58−1.04) | 0.010 |  |  |
| ECOG PS (≥ 2 vs 0-1) | 3.58 (2.59−4.94) | **<0.001** | 3.20 (2.31−4.45) | **<0.001** |
| Histology (mixed vs pure UC) | 0.86 (0.59−1.26) | 0.446 |  |  |
| Upper vs Lower urinary tract | 1.17 (0.93−1.49) | 0.186 |  |  |
| Synchronous metastatic disease (Y vs N) | 1.33 (1.01−1.77) | **0.044** | 1.31 (0.98−1.74) | 0.064 |
| Lymph node (Y vs N) | 1.20 (0.90−1.61) | 0.216 |  |  |
| Liver metastases (Y vs N) | 1.51 (1.11-2.06) | **0.008** | 1.51 (1.09-2.08) | **0.012** |
| Bone metastases (Y vs N) | 1.58 (1.18-2.13) | **0.002** | 1.45 (1.07-1.96) | **0.016** |
| Brain metastases (Y vs N) | 2.56 (1.30−4.99) | **0.007** | 3.66 (1.81-7.40) | **<0.001** |
| BMI = Body Mass Index; ECOG-PS = Eastern Cooperative Oncology Group-Performance Status; Y = yes; N = no | | | | |

**Table S4.** Univariable and multivariable analyses in patients with liver metastases.

| **Overall Survival** | **Univariable Cox Regression** | | **Multivariable Cox Regression** | |
| --- | --- | --- | --- | --- |
| **HR (95%CI)** | ***p-value*** | **HR (95%CI)** | ***p-value*** |
| Sex (females vs males) | 1.56 (1.05−2.31) | **0.028** | 1.85 (1.23−2.78) | **0.003** |
| Age < 50y (Y vs N) | 0.93 (0.47−1.84) | 0.837 |  |  |
| BMI (> 25 vs ≤ 25) | 0.72 (0.50−1.04) | 0.078 |  |  |
| Smokers vs non-smokers | 0.88 (0.60−1.29) | 0.504 |  |  |
| ECOG PS (≥ 2 vs 0-1) | 3.49 (2.27−5.37) | **<0.001** | 3.46 (2.20−5.43) | **<0.001** |
| Histology (mixed vs pure UC) | 0.83 (0.49−1.40) | 0.479 |  |  |
| Upper vs Lower urinary tract | 0.98 (0.74−1.29) | 0.858 |  |  |
| Synchronous metastatic disease (Y vs N) | 1.55 (1.08−2.21) | **0.018** | 1.36 (0.94−1.96) | 0.105 |
| Lymph node (Y vs N) | 1.14 (0.78−1.66) | 0.500 |  |  |
| Lung metastases (Y vs N) | 1.10 (0.77−1.58) | 0.577 |  |  |
| Bone metastases (Y vs N) | 1.65 (1.13-2.39) | **0.009** | 1.47 (1.01-2.16) | **0.047** |
| Brain metastases (Y vs N) | 1.59 (0.74−3.42) | 0.239 |  |  |
| BMI = Body Mass Index; ECOG-PS = Eastern Cooperative Oncology Group-Performance Status; Y = yes; N = no | | | | |

**Figure S1:** Overall survival in the patients receiving pembrolizumab, stratified for sex, in the subgroup of age>50 years, ECOG-PS ≥ 2, not pure urothelial histology, upper urinary tract, 1 site of metastasis, and metachronous metastatic disease.
